# Supplementary material for: A 3d–4f heterometallic 3D POMOF based on lacunary Dawson polyoxometalates
Source: Royal Society of Chemistry journal article supplement (doi:10.1039/c3dt51983j), 2013-01-01
Supplement: c3dt51983j.pdf [file c3dt51983j.pdf]

Electric Supplemental Information for:

## A 3d-4f Heterometallic 3D POMOF Based on Lacunary Dawson Polyoxometalates†

Tingting Yu, Huiyuan Ma\*, Chunjing Zhang, Haijun Pang\*, Shaobin Li and  
Heng Liu

### Table of contents:

1. **Scheme S1** Scheme show the typical example of one pot method
2. **Scheme S2** Scheme show the typical example of stepwise method
3. **Chart S1** Structure of 4,4'-dipyridine-N,N'-dioxide ligand
4. **Fig. S1** The structure of  $[\text{Mn}_4(\text{HP}_2\text{W}_{15}\text{O}_{56})_2]^{14-}$  unit. Symmetry code: (I)  $1 + x, 2 + y, z$
5. **Fig. S2** Coordination environment of the Ce1 and Ce2 cations (H atoms are omitted for clarity)
6. **Fig. S3** The coordination relation between the  $[\text{Mn}_4(\text{HP}_2\text{W}_{15}\text{O}_{56})_2]^{14-}$  clusters and 1D zigzag chains.
7. **Fig. S4** Schematic view of the formation of the 3D POMOFs.
8. **Fig. S5** The detailed view of the self-penetrating structure in **1**.
9. **Fig. S6** The IR spectrum of compound **1**
10. **Fig. S7** The simulative (black) and experimental (red) powder X-ray diffraction patterns for **1**
11. **Fig. S8** The TG curve for compound **1**.
12. **Table S1**. Summary of Calculated Values from BVS for **1**
13. **Fig. S9**. The CV of **1** in the  $\text{Na}_2\text{SO}_4/\text{H}_2\text{SO}_4$  aqueous solution at the scan rate of  $20 \text{ mV} \cdot \text{s}^{-1}$ .
14. **Fig. S10** 100 consecutive CV cycles of the **1**-CPE at  $20 \text{ mV s}^{-1}$
15. **Fig. S11** The  $\chi_m^{-1}$  versus  $T$  plot of **1**
16. Electrocatalytic properties of  $\text{Na}_{12}[\alpha\text{-P}_2\text{W}_{15}\text{O}_{56}] \cdot 24\text{H}_2\text{O}$  and  $\text{Na}_{16}[\text{Mn}_4(\text{H}_2\text{O})_2(\text{P}_2\text{W}_{15}\text{O}_{56})_2] \cdot 53\text{H}_2\text{O}$

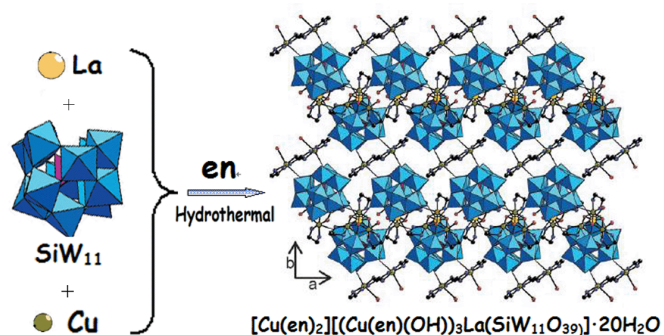

**Scheme S1** Scheme show the typical example of one pot method<sup>1</sup>

1 B. Nohra, P. Mialane, A. Dolbecq, E. Rivière, J. Marrota and F. Sécheresse, *Chem. Commun.*, 2009, 2703.

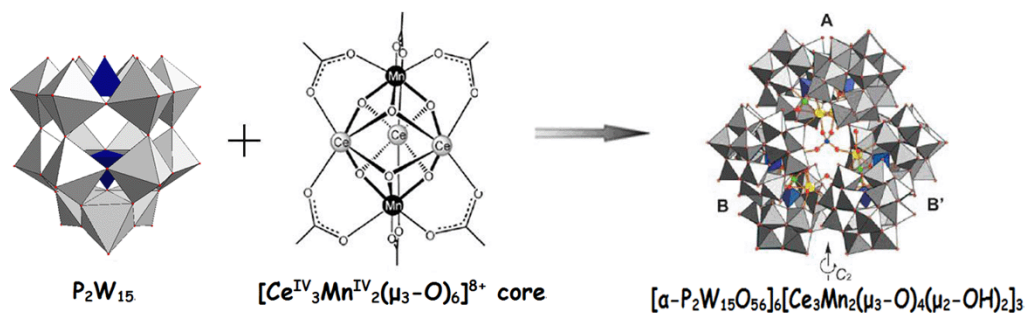

**Scheme S2** Scheme show the typical example of stepwise method<sup>2</sup>

2 X. K. Fang and P. Kögerler, *Angew. Chem. Int. Ed.*, 2008, **47**, 8123.

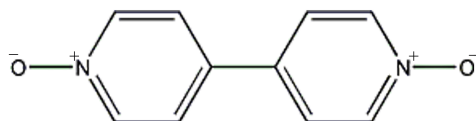

**Chart S1** Structure of 4,4'-dipyridine-N,N'-dioxide Ligand

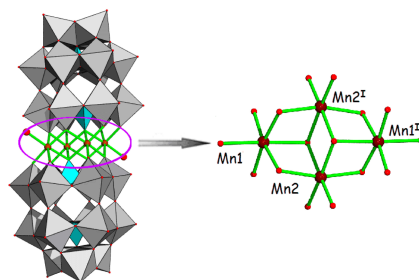

**Fig. S1** The structure of  $[\text{Mn}_4(\text{HP}_2\text{W}_{15}\text{O}_{56})_2]^{14-}$  unit. Symmetry code: (I)  $1 + x, 2 +$

$y, z$

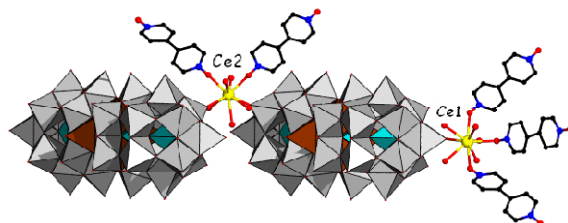

**Fig. S2** Coordination environment of the Ce1 and Ce2 cations (H atoms are omitted for clarity)

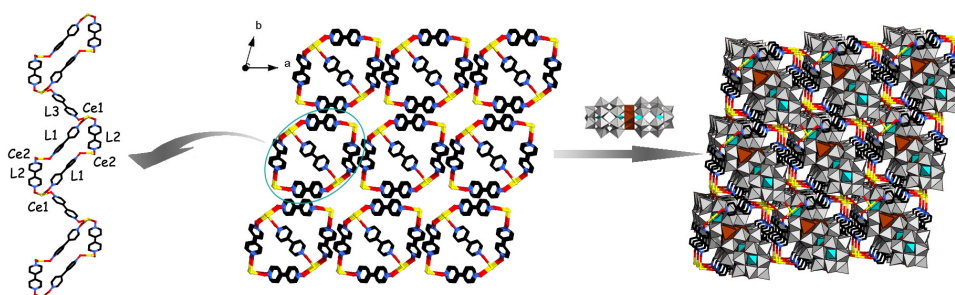

**Fig. S3** Schematic view of the formation of the 3D POMOFs.

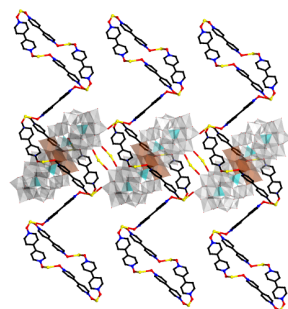

**Fig. S4** The coordination relation between the  $[\text{Mn}_4(\text{HP}_2\text{W}_{15}\text{O}_{56})_2]^{14-}$  clusters and 1D zigzag chains.

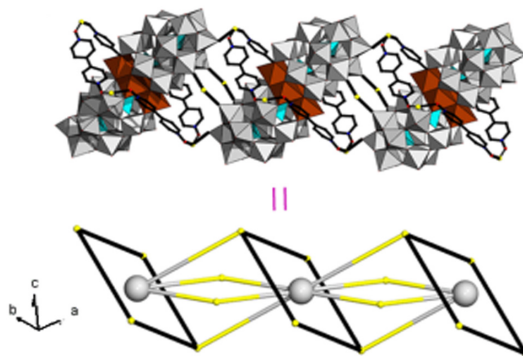

**Fig. S5** The detailed view of the self-penetrating structure in **1**.

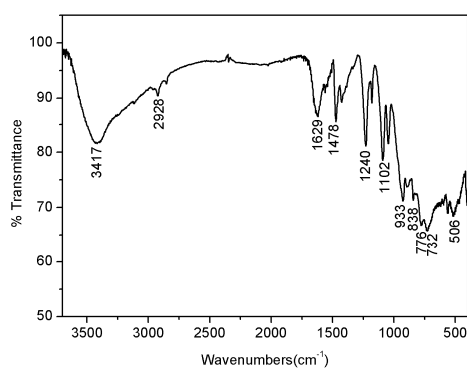

**Fig. S6** The IR spectrum of compound **1**

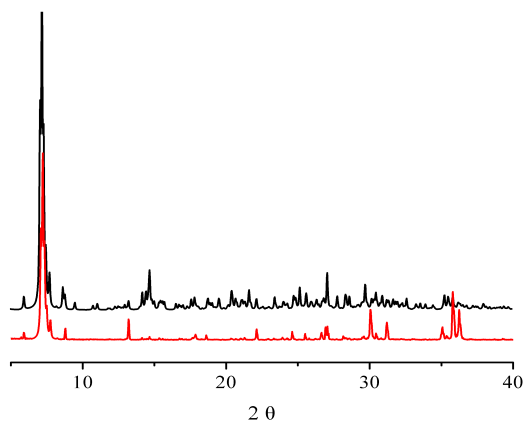

**Fig. S7.** The simulative (black) and experimental (red) powder X-ray diffraction patterns for **1**

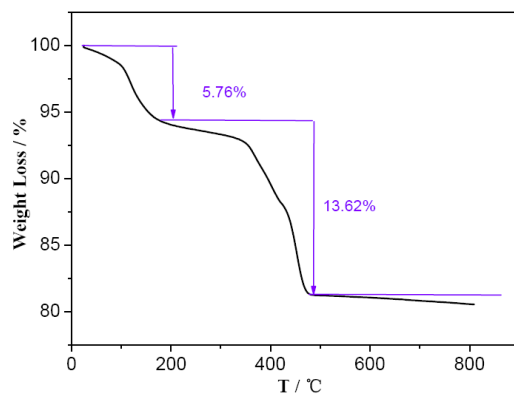

**Fig. S8** The TG curve for compound **1**.

| atom | $R_0$ | BVS   | atom | $R_0$ | BVS   |
|------|-------|-------|------|-------|-------|
| W1   | 1.921 | 6.428 | W12  | 1.921 | 6.095 |
| W2   | 1.921 | 6.014 | W13  | 1.921 | 6.181 |
| W3   | 1.921 | 6.247 | W14  | 1.921 | 6.111 |
| W4   | 1.921 | 6.338 | W15  | 1.921 | 6.135 |
| W5   | 1.921 | 6.128 | P1   | 1.604 | 4.645 |
| W6   | 1.921 | 6.476 | P2   | 1.604 | 4.907 |
| W7   | 1.921 | 6.260 | Mn1  | 1.79  | 2.214 |
| W8   | 1.921 | 6.149 | Mn2  | 1.79  | 2.171 |
| W9   | 1.921 | 6.416 | Ce1  | 2.151 | 3.220 |
| W10  | 1.921 | 6.498 | Ce2  | 2.151 | 3.288 |
| W11  | 1.921 | 6.160 |      |       |       |

**Table S1.** Summary of Calculated Values from BVS for **1**

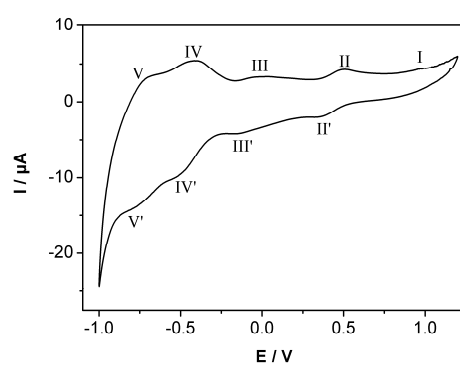

**Fig. S9.** The CV of **1**-CPE in the  $\text{Na}_2\text{SO}_4/\text{H}_2\text{SO}_4$  aqueous solution at the scan rate of  $20 \text{ mV} \cdot \text{s}^{-1}$ .

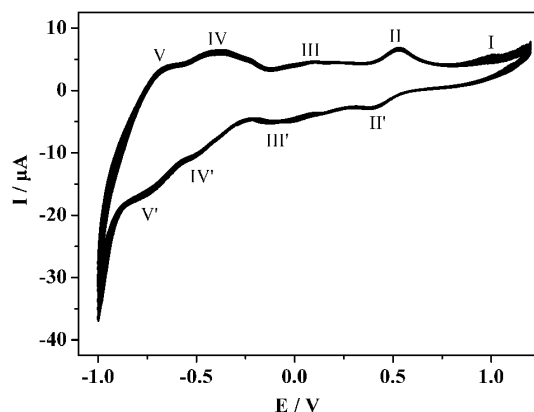

**Fig. S10** 100 consecutive CV cycles of the **1**-CPE at 20 mV s<sup>-1</sup>

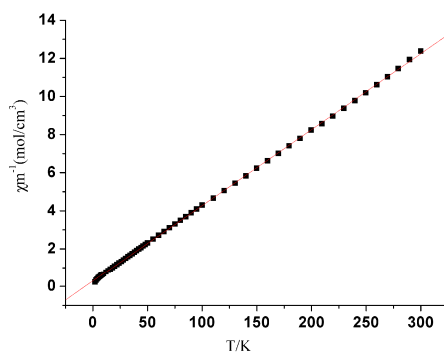

**Fig. S11** The  $\chi_m^{-1}$  versus  $T$  plot of **1**

## 16. Electrocatalytic properties of Na<sub>12</sub>[ $\alpha$ -P<sub>2</sub>W<sub>15</sub>O<sub>56</sub>] $\cdot$ 24H<sub>2</sub>O and

### Na<sub>16</sub>[Mn<sub>4</sub>(H<sub>2</sub>O)<sub>2</sub>(P<sub>2</sub>W<sub>15</sub>O<sub>56</sub>)<sub>2</sub>] $\cdot$ 53H<sub>2</sub>O

The electrocatalytic properties of Na<sub>12</sub>[ $\alpha$ -P<sub>2</sub>W<sub>15</sub>O<sub>56</sub>] $\cdot$ 24H<sub>2</sub>O (P<sub>2</sub>W<sub>15</sub>) and Na<sub>16</sub>[Mn<sub>4</sub>(H<sub>2</sub>O)<sub>2</sub>(P<sub>2</sub>W<sub>15</sub>O<sub>56</sub>)<sub>2</sub>] $\cdot$ 53H<sub>2</sub>O were performed for comparison, and the CAT (catalytic efficiency) of P<sub>2</sub>W<sub>15</sub>-CPE towards KIO<sub>3</sub> was calculated and compared to that of **1**-CPE.

Different from the **1**-CPE having bifunctional electrocatalytic activities (please see the Fig. 4 in the MS), the P<sub>2</sub>W<sub>15</sub>-CPE only has electrocatalytic reduction activity towards the inorganic molecule iodate (KIO<sub>3</sub>), and has no electrocatalytic activity towards ascorbic acid (AA), dopamine (DA) (please see the Fig. S12 below). The CAT of P<sub>2</sub>W<sub>15</sub>-CPE (85.30%) towards IO<sub>3</sub><sup>-</sup> is lower than the CAT of **1**-CPE (197.50%) towards IO<sub>3</sub><sup>-</sup>. And the Na<sub>16</sub>[Mn<sub>4</sub>(H<sub>2</sub>O)<sub>2</sub>(P<sub>2</sub>W<sub>15</sub>O<sub>56</sub>)<sub>2</sub>] $\cdot$ 53H<sub>2</sub>O-CPE has no

electrocatalytic activities towards AA, DA, H<sub>2</sub>O<sub>2</sub> and KIO<sub>3</sub> (see Fig. S13 and Fig. S14 below). Herein, It can be concluded that both Mn(II) and Ce(III) cations may strongly influence the electrocatalytic activities of P<sub>2</sub>W<sub>15</sub> clusters in **1**, which finally results in the bifunctional electrocatalytic activity of **1**.

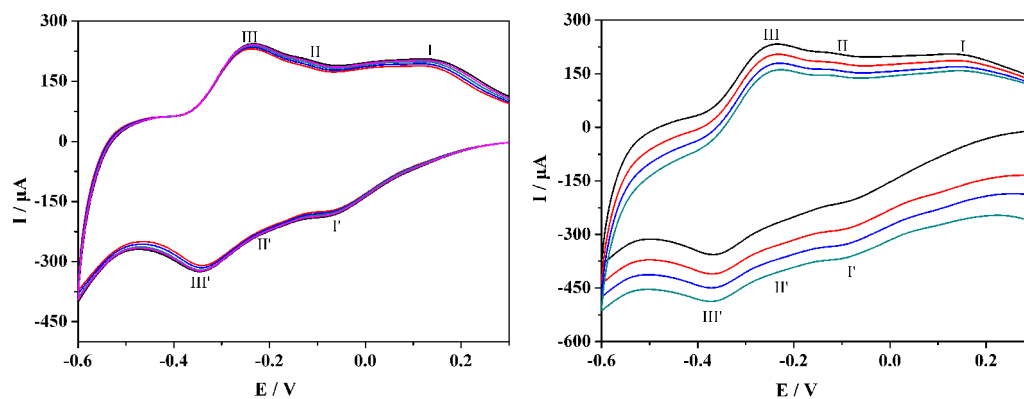

**Fig. S12** Reduction of H<sub>2</sub>O<sub>2</sub> (left) and IO<sub>3</sub><sup>-</sup> (right) at P<sub>2</sub>W<sub>15</sub>-CPE in 1 M H<sub>2</sub>SO<sub>4</sub> solution. Scan rate: 0.05 V·s<sup>-1</sup>.

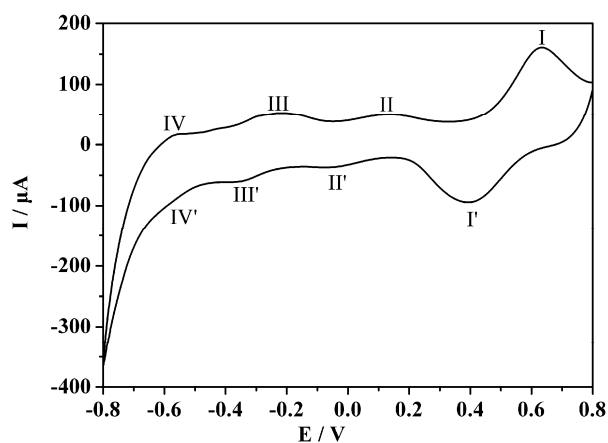

**Fig. S13** The CV of Na<sub>16</sub>[Mn<sub>4</sub>(H<sub>2</sub>O)<sub>2</sub>(P<sub>2</sub>W<sub>15</sub>O<sub>56</sub>)<sub>2</sub>]·53H<sub>2</sub>O -CPE in the 1 M H<sub>2</sub>SO<sub>4</sub> solution at the scan rate of 0.02 V·s<sup>-1</sup>.

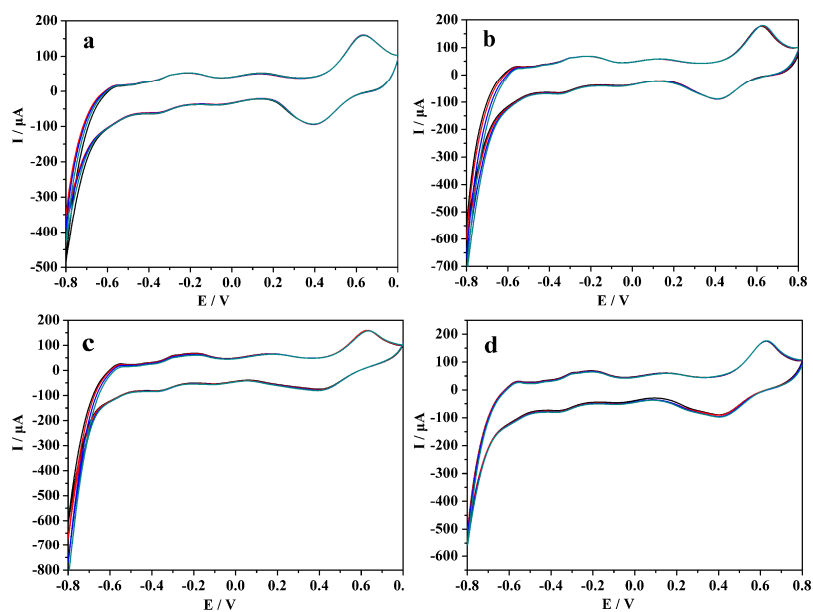

**Fig. S14** Electrocatalytic reaction of AA (a), DA (b), H<sub>2</sub>O<sub>2</sub> (c) and KIO<sub>3</sub> (d) at Na<sub>16</sub>[Mn<sub>4</sub>(H<sub>2</sub>O)<sub>2</sub>(P<sub>2</sub>W<sub>15</sub>O<sub>56</sub>)<sub>2</sub>]·53H<sub>2</sub>O-CPE in 1 M H<sub>2</sub>SO<sub>4</sub> solution at the scan rate of 0.02 V·s<sup>-1</sup>.
